1         **Physiological adaptations to reproduction I. Experimentally increasing litter size**  
2         **enhances aspects of antioxidant defence but does not cause oxidative damage in mice**

3

4     Key words: life history, reproduction, trade off, senescence, ageing

5

6         **Michael Garratt<sup>1\*</sup>, Nicolas Pichaud<sup>1,2</sup>, Edith D. Aloise King<sup>1</sup>, Robert C Brooks<sup>1</sup>**

7

8         <sup>1</sup>Evolution & Ecology Research Centre and School of Biological, Earth and Environmental  
9         Sciences, The University of New South Wales, Sydney, New South Wales 2052, Australia.

10

11         <sup>2</sup>School of Biotechnology and Biomolecular Sciences, The University of New South Wales,  
12                     Sydney, New South Wales 2052, Australia.

13

14

15     \*Author for correspondence (Michael.Garratt@unsw.edu.au)

16

17

18

19

20 **SUMMARY**

21 Life history theory suggests that investment in reproduction can trade off against growth,  
22 longevity and both reproduction and performance later in life. One possible reason for this  
23 trade-off is that reproduction directly causes somatic damage. Oxidative stress, an  
24 overproduction of reactive oxygen species in relation to cellular defences, can correlate with  
25 reproductive investment and has been implicated as a pathway leading to senescence. This  
26 has led to the suggestion that this aspect of physiology could be an important mechanism  
27 underlying the trade-off between reproduction and lifespan. We manipulated female  
28 reproductive investment to test whether oxidative stress increases with reproduction in mice.  
29 Each female's pups were cross-fostered to produce litters of either two or eight, representing  
30 small and large levels of reproductive investment for wild mice. No differences were  
31 observed between reproductive groups at peak-lactation for several markers of oxidative  
32 stress in the heart and gastrocnemius muscle. Surprisingly, oxidative damage to proteins was  
33 lower in the livers of females with a litter size of eight than in females with two pups or non-  
34 reproductive control females. While protein oxidation decreased, activity levels of the  
35 antioxidant enzyme superoxide dismutase increased in the liver, suggesting this may be one  
36 pathway used to protect against oxidative stress. Our results highlight the need for caution  
37 when interpreting correlative relationships and suggest that oxidative stress does not increase  
38 with enhanced reproductive effort during lactation.

39

40

## 41 INTRODUCTION

42 Theories of ageing often predict that an organism's lifespan is heavily influenced by  
43 their investment in other life history traits earlier in life (Stearns, 1992). In particular, large  
44 investments in reproduction are expected to lead to faster ageing. This trade-off may occur on  
45 several different levels. From an evolutionary perspective, genes that facilitate investment in  
46 reproduction early in life may be selected for even if they confer deleterious effects later in  
47 life, as the force of natural selection diminishes with age (Williams, 1957). From a  
48 physiological perspective increased investment in reproduction by an individual may either  
49 reduce the resources available for protection against somatic damage (Kirkwood and  
50 Holliday, 1979) or directly damage the soma (Partridge et al., 2005; Harshman and Zera,  
51 2007).

52 The physiological constraints that limit investment in both reproduction and lifespan  
53 are not well understood and stir ongoing debate. One aspect of physiology that has been  
54 implicated in ageing for 50 years is oxidative stress (Harman, 1956; Beckman and Ames,  
55 1998), which occurs when there is a imbalance between the production of Reactive Oxygen  
56 Species (ROS) and an organism's capacity to mitigate their damaging effects (Monaghan et  
57 al., 2009). ROS are potentially damaging molecules, produced from a variety of sources in  
58 biological systems, although most notably the electron transport system during energy  
59 metabolism. To protect against the negative consequences of ROS organisms have evolved a  
60 variety of defence mechanisms that limit ROS production, reduce these molecules to less  
61 reactive forms and repair any damage incurred (Halliwell and Gutteridge, 1999). ROS can  
62 cause oxidative damage - reversible or irreversible damage to proteins, lipids and DNA,  
63 which can impair cellular function (Monaghan et al., 2009). Oxidative stress can further limit  
64 an organism's ability to respond to redox signals and regulate gene expression (Droge, 2002)  
65 and has therefore also been described as a disruption in redox signalling and control (Jones,  
66 2006). Recent suggestions that oxidative stress could be an unavoidable consequence of  
67 reproduction (Costantini, 2008; Speakman, 2008; Dowling and Simmons, 2009; Monaghan et  
68 al., 2009) have led to further speculation that this aspect of physiology could mediate the  
69 trade-off between reproduction and lifespan (Dowling and Simmons, 2009; Monaghan et al.,  
70 2009).

71 Reproduction could cause oxidative stress via several non-mutually exclusive  
72 pathways. Investment in reproduction usually requires animals to increase energy

73 consumption (Gittleman and Thompson, 1988). As the majority of ROS are produced from  
74 the electron transport system during oxidative phosphorylation (Balaban et al., 2005), the  
75 increases in metabolic rate required to facilitate reproductive investment could produce  
76 greater levels of ROS (Alonso-Alvarez et al., 2004; Speakman, 2008). Further, investment in  
77 reproduction could limit the availability of resources required for the production or  
78 maintenance of defence mechanisms that protect against oxidative stress (Monaghan et al.,  
79 2009). Under this scenario, reproductive investment will require animals to reduce  
80 investment in antioxidant defence (or other protective mechanisms), therefore increasing their  
81 susceptibility to oxidative stress.

82 In spite of these predictions there is little direct experimental evidence that  
83 reproductive investment elevates oxidative stress. In birds, provisioning is expected to be the  
84 most demanding period of reproduction for parents and a number of authors have  
85 demonstrated changes in aspects of antioxidant defence during this period (Alonso-Alvarez et  
86 al., 2004; Wiersma et al., 2004; Christe et al., 2012). For example, Wiersma et al., (2004)  
87 demonstrated that zebra finches (*Taeniopygia guttata*) provisioning experimentally enlarged  
88 broods show a reduction in the activity of both superoxide dismutase (SOD) and glutathione  
89 peroxidase (GPx) in pectoral muscle when results are scaled to daily energy expenditure  
90 (DEE). In females, this change was principally due to an increase in DEE, while in males the  
91 decrease in SOD activity scaled to DEE was the result of a reduction in SOD activity itself.  
92 Another early study in zebra finches also demonstrated a sex-specific change in total  
93 antioxidant capacity in blood (Alonso-Alvarez et al., 2004). Males with enlarged broods  
94 showed a reduction in total antioxidant capacity when compared to males with reduced  
95 broods, while females in these two brood sizes did not differ for this marker. These results  
96 suggest, therefore, that some changes in oxidative balance are occurring with reproduction,  
97 although without measures of ROS production or oxidative damage it is difficult to ascertain  
98 whether oxidative stress is actually increasing with reproductive effort.

99 In mammals, females usually invest much more in parental care than males (Clutton-  
100 Brock, 1991) and lactation is the most energetically demanding period of a female's life. As a  
101 consequence, it has been predicted that oxidative stress could increase during this  
102 reproductive period (Speakman, 2008). Two studies in wild mammals have assessed the  
103 correlation between female reproductive effort and plasma Malondialdehyde (MDA), a  
104 marker of oxidative damage to lipids. In soay sheep (*Ovis aries*) no relationship was found  
105 between total reproductive effort and MDA (Nussey et al., 2009), while in eastern chipmunks

106 (*Tamias striatus*) MDA correlated positively with litter size in sexually mature females  
107 (Bergeron et al., 2011). Two other studies conducted in the laboratory on small rodents  
108 compared oxidative stress between females allowed to reproduce and those that were not.  
109 Surprisingly, Ołdakowski et al., (2012) found that MDA levels were lower in the skeletal  
110 muscle and kidneys of reproducing female bank voles (*Myodes glareolus*). Similarly Garratt  
111 et al., (2011) revealed a decrease in MDA levels as well as in several other markers of  
112 oxidative stress, in the livers of reproducing female house mice (*Mus musculus domesticus*).  
113 Garratt et al. (2011) did, however, report a positive correlation between protein oxidation and  
114 litter size in female house mice at peak lactation, hinting that oxidative stress may increase  
115 with reproductive effort during particular reproductive periods.

116 While this research has provided an interesting first insight into changes in oxidative  
117 stress with reproduction, the techniques used to test for a “cost of reproduction” in mammals  
118 have either been correlative (Nussey et al., 2009; Bergeron et al., 2011), or have consisted of  
119 indirect manipulations, i.e. manipulating the presence of a male rather than the level of  
120 reproductive effort itself. Such indirect manipulations have been criticised because the  
121 environmental change that causes the difference in reproductive investment (i.e. the presence  
122 of the male) may itself cause changes in the observed variable, in this case oxidative stress,  
123 rather than investment in reproduction itself (Lessells, 1991). By contrast, more direct  
124 manipulations, such as clutch size manipulation in birds or litter size manipulations in  
125 mammals, are much more likely to induce elevated investment in reproduction while  
126 allowing all or most confounding variables to be held constant.

127 In this study we manipulated female investment in reproduction by allowing some  
128 females to breed and keeping others as unmated controls. We then manipulated the  
129 reproductive females’ investment in lactation by cross-fostering pups so that each female  
130 lactated for either two or eight pups, representing either a large or a small litter for wild-  
131 derived female mice (Berry, 1981). Such litter size manipulations have provided an insight  
132 into the energy expenditure of female mice during lactation (Hammond et al., 1994; Johnson  
133 et al., 2001). Furthermore, experimentally increasing the litter size of bank voles in the wild  
134 has revealed a survival cost of increased litter sizes, highlighting that these techniques can  
135 reveal broad scale trade-offs that occur between life history traits (Koivula et al., 2003).  
136 Females were allowed to reach day 14 of lactation, which is the point when energetic  
137 demands are at their peak (Johnson et al., 2001), and were then assessed for several markers  
138 of oxidative stress. As recently recommended (Selman et al., 2012), we used a multiple assay

139 approach to assess oxidative stress in several different tissues. We began by measuring two  
140 different markers of oxidative stress (protein thiols and the proportion of oxidised to total  
141 glutathione; Table 1) in three different tissues (liver, heart and gastrocnemius muscle). The  
142 liver and heart are metabolically active organs that, in mice at least, show an increase in mass  
143 during lactation, presumably to allow a greater processing of nutrients and removal of waste  
144 products (Hammond et al., 1994). The mass of the liver has also been found to be the most  
145 significant predictor of resting metabolic rate in at least one strain of mice. (Selman et al.,  
146 2001). Thus, it could be expected that these areas may be susceptible to oxidative stress  
147 during reproduction. Measurement of oxidative damage in the gastrocnemius muscle also  
148 allowed us to assess oxidative stress in a post-mitotic tissue that is not directly linked to  
149 lactation. As these two markers of oxidative stress were found to differ in the liver, we  
150 conducted a further examination of oxidative stress markers in this tissue (protein carbonyls  
151 and aconitase; table 1). We also assessed whether these changes were linked to any altered  
152 activity of endogenous antioxidants (total glutathione, superoxide dismutase, catalase; Table  
153 1).

154 A negative relationship between clutch size and the ability of a chick's red blood cells  
155 to protect against a controlled free radical attack has previously been demonstrated in zebra  
156 finches (*Taeniopygia guttata*) (Alonso-Alvarez et al., 2006) and it has been suggested that  
157 these differences in resistance to oxidative stress could, at least in part, contribute to the  
158 reduced fitness of individuals raised in large broods. We also took this opportunity to explore  
159 the possibility of such a trade-off in a mammal by relating our measures of oxidative stress to  
160 the litter size into which each experimental female had been born.

161 In addition to manipulating reproductive investment, we fed females one of two  
162 different diets, which differed in presence of an antioxidant preservative (Oxystat, which  
163 contains the phenolic antioxidants butylated hydroxyanisole (BHA); 6-ethoxy-2,2,4-  
164 trimethyl-1,2-dihydroquinoline (ethoxyquin); and 2,6-bis(1,1-dimethylethyl)-4-methylphenol  
165 (BHT); see methods). These antioxidants are used by the food industry to prevent rancidity  
166 over long-term storage (Halliwell and Gutteridge, 1999) . It has been suggested preservatives  
167 of this type can limit oxidative stress when added to rodent feeds at high levels (Jaeschke and  
168 Wendel, 1986; Malhotra et al., 2008). Thus we considered it prudent to ensure that if our  
169 study replicated the decreases in markers of oxidative stress reported previously in  
170 reproducing female rodents (Garratt et al., 2011; Ołdakowski et al., 2012), which it did, these  
171 effects were not caused by females increasing their food consumption during lactation and  
172 consuming more of these synthetic dietary additives.

173

## 174 **MATERIALS AND METHODS**

### 175 **Subjects**

176           Subjects (n = 60) were adult first generation captive bred female house mice derived  
177 from 30 wild mice caught at a chicken farm in the North-West of Sydney, Australia.  
178 Experimental females were weaned at 28 days old and remained with their female siblings  
179 until the beginning of the experiment. Males that were used to breed with females were  
180 housed singly after weaning at 28 days old. All animals were housed in cages (48 cm X 11.5  
181 cm X 12 cm) lined with Shepherd's corn cob substrate and had shredded newspaper and  
182 tissue added for bedding. All animals had ad libitum access to water and to food (see below).  
183 Mice were maintained on a 12 hour reverse light cycle and experimental procedures were  
184 conducted under dim red light during the dark phase.

### 185 **Animal Diets**

186           Prior to the experiment animals were fed a maintenance rodent feed from Gordon's  
187 Speciality Stockfeeds (3930 Remembrance Drive, Yanderra, NSW 2574, Australia; see  
188 supplementary datasheet for complete listing of ingredients and supplementary Table 1 for a  
189 breakdown of constituents), which contained no added vitamin C and vitamin E at  
190 concentration of 40.192 iu per kg finished feed. This feed also contained oxystat, a premix  
191 that contains three different synthetic antioxidants (BHA: 8.32 ppm in finished feed;  
192 ethoxyquin: 5.49 ppm; BHT: 83.2 ppm) and a biological chelating agent (further information  
193 can be found on the distributors website: <http://www.kiotechagil.com/products/oxistat/>  
194 accessed 1<sup>st</sup> February 2013; and in the supplementary information), at a finished feed rate of  
195 832 ppm.

196           Two weeks prior to breeding, females were randomly allocated to one of two different  
197 versions of the maintenance rodent feed, both of which were manufactured by Gordon's  
198 Speciality Stockfeeds on the same day, using the same ingredients and treated in an identical  
199 manner. Feeds were delivered to the University of New South Wales and stored for three  
200 months prior to the experiment in an area of dry humidity, at room temperature as per the  
201 advice of the manufacturers of both Oxystat and the rodent feed. The first group of animals  
202 were fed the normal maintenance feed as outlined above (n = 30). The second group were fed  
203 an identical version of the maintenance feed, except it did not contain the Oxystat food

204 preservative (n = 30). Females on each diet were further randomly allocated to three different  
205 experimental groups: non-reproductive control (n = 10 for each diet), small litter (n = 10 for  
206 each diet) and large litter (n = 10 for each diet). Females in these different groups did not  
207 differ in age at the start of the experiment (normal food: controls =  $112 \pm 8$  days old; large  
208 litter =  $110 \pm 10$  days; small litter  $110 \pm 10$  days; custom food: controls =  $109 \pm 8$  days; large  
209 litter =  $98 \pm 7$  days; small litter =  $104 \pm 10$  days; difference between groups:  $F_{2,53} = 0.26$ ,  $P =$   
210  $0.78$ ; difference between diets:  $F_{1,53} = 1.05$ ,  $P = 0.31$ ).

211

## 212 **Breeding protocol**

213 After two weeks on the experimental feeds, females in small litter and large litter  
214 groups were randomly allocated a male to breed with. Three days prior to breeding, females  
215 were given a small handful of bedding taken from the cage of the male they were to breed  
216 with and were housed adjacent to that male's cage for the next three days to allow  
217 familiarisation. Males and females were then housed in the same cage and allowed to breed  
218 for 18 days, after which the male was removed. If the female was not obviously pregnant  
219 after 18 days the male was allowed to remain with the female until she was pregnant. The  
220 time from pairing with a male until giving birth was not related to oxidative stress  
221 (Supplementary Table 2). After six weeks three females were still not pregnant and were  
222 removed from the experiment. Each control female was paired with a novel female after an  
223 identical familiarisation period with a male.

224 Within 24 hours of giving birth, the natural litter of each experimental female was  
225 removed and replaced with either a litter of two pups or eight pups. Females were randomly  
226 allocated to the two or eight pup treatments and there was no difference in the natural litter  
227 sizes that these two groups of females gave birth to ( $t_{31} = 1.51$ ,  $P = 0.15$ ). The cross-fostered  
228 pups were born within 24 hours of the natural litter and, on each occasion, the pups for each  
229 female's manipulated litter were derived from two different females (i.e. each female's litter  
230 was comprised of pups from two different females). Females were allowed to nurse these  
231 pups for 14 days and were then culled by cervical dislocation. Control females were culled in  
232 the same manner and over the same period as reproductive females. Four females failed to  
233 produce litters on days when there were other pups available to cross-foster and so were  
234 removed from the experiment. Final sample sizes for reproductive groups were as follows:



235 custom feed large litter = 9; custom feed small litter = 7; normal feed large litter = 9; normal  
236 feed small litter = 8.

237

### 238 **Sample collection and biochemical assays**

239 Immediately after being culled females were quickly dissected and organs flash  
240 frozen in liquid nitrogen and stored at -80°C. Due to limitations in the number of samples that  
241 could be run concurrently for commercial assays (n = 6 from each group for protein  
242 carbonyls, superoxide dismutase), some randomly selected individuals from each group were  
243 omitted from these analyses.

244

### 245 **Markers of oxidative stress**

246 Total and oxidised glutathione were measured using the automated glutathione  
247 recycling assay (Anderson, 1996) modified for use on a plate reader (Vasilaki et al., 2006).  
248 Protein thiols were measured as described by Di Monte et al. (Dimonte et al., 1984) modified  
249 for use on a plate reader (Vasilaki et al., 2006). Protein carbonyls were measured using the  
250 ELISA kit of Biocell Corp (Auckland, New Zealand).

251

### 252 **Enzymatic antioxidant capacity**

253 Total superoxide dismutase activity was measured using the superoxide dismutase  
254 assay kit from Cayman Chemicals (Michigan, USA). Enzymatic activity of catalase was  
255 measured according to the method of Aebi (1984) modified for microplate. Briefly,  
256 homogenates were centrifuged at 13,000g for 3 min at 4°C. The resulting supernatant was  
257 incubated with 100mM of potassium phosphate complemented with 0.1% (v/v) Triton X-100  
258 and 60mM of H<sub>2</sub>O<sub>2</sub>. The decrease in absorbance was measured at a wavelength of 240nm in  
259 UV-star<sup>®</sup> microplates (Greiner Bio-One, Germany) for 2 min ( $\epsilon_{240}=43.6\text{mL/cm}/\mu\text{mol}$ ).

260

### 261 **Marker of ROS production**

262 Aconitase is an enzyme of the tricarboxylic acid cycle that is inactivated by  
263 superoxide, and therefore has been suggested to be a reliable marker for mitochondrial ROS  
264 production (Hausladen and Fridovich, 1994, 1996). Homogenates were transferred in 50mM  
265 Tris-HCl, 0.1% (v/v) Triton X-100, 0.6mM MnCl<sub>2</sub>, 5mM sodium citrate, 0.2mM NADP, 0.4  
266 U/mL isocitrate dehydrogenase, pH 7.4. Activity was measured by following the appearance  
267 of NADPH at 340nm ( $\epsilon_{340}=6.22\text{mL/cm}/\mu\text{mol}$ ) over 4 min.

268

### 269 **Citrate synthase activity**

270 Citrate synthase activity was measured in liver homogenates according to Pichaud et  
271 al. (Pichaud et al., 2010). Homogenates were transferred in 100 mM imidazole-HCl (pH 8),  
272 0.1 mM 5,5-dithiobis(2-nitrobenzoic acid) (DTNB), 0.1 mM acetyl CoA and 0.15 mM  
273 oxaloacetate. Activities were determined by following the increase in absorbance due to the  
274 reduction of DTNB at 412 nm.

275

### 276 **Statistical analyses**

277 Linear mixed effects models were used to test for differences between experimental  
278 groups and feed types in SPSS version 20. This allowed us to add the ID of each pair of wild  
279 caught parent mice used to breed experimental animals as a random effect to each model.  
280 Group and feed type were included as fixed effects and the litter size that experimental  
281 females were reared in was included as a covariate. Backwards selection was used to remove  
282 non-significant variables and interactions. For analyses of organ masses, log-transformed  
283 body mass was included as a covariate. Food consumption during lactation was analysed  
284 using a repeated measures General Linear Model (GLM), applying the greenhouse geisser  
285 correction to control for an effect of sphericity. Oxidative stress results were log-transformed  
286 where necessary to ensure normal distribution. Correlations between natural litter size,  
287 changes in pup number and oxidative stress were assessed using a Spearman's rank  
288 correlation test.

289

290

## 291 **RESULTS**

292 Female reproductive effort was manipulated in two ways: by allowing some females  
293 to get pregnant and keeping others as unmated controls, and by removing the natural litter of  
294 each female that reproduced and replacing it with pups birthed on the same day by different  
295 females. Females were either given two or eight pups, which resulted in females that were  
296 allocated a litter size of eight having an average of 2.2 more pups ( $\pm 0.36$ ) than the natural  
297 litter size they gave birth to and females allocated a litter size of two having their litter size  
298 reduced by an average of 4.5 pups ( $\pm 0.26$ ). Females allocated a litter size of eight therefore  
299 had a greatly increased reproductive burden when compared to females with a litter size of  
300 two ( $t_{31} = 14.65$ ,  $P < 0.001$ ).

301

### 302 **Reproductive investment in wild-derived mice**

303 Wild-derived females that were allocated a litter of eight pups consumed significantly  
304 more food over lactation than females allocated only two pups, and females from both of  
305 these reproductive treatments ate significantly more than non-reproductive control females  
306 (Fig. 1a; interaction between reproductive treatment and time:  $F_{5,4,136} = 2.54$ ,  $P = 0.030$ ;  
307 effect of reproductive treatment over the lactation period:  $F_{2,34} = 45.10$ ,  $P < 0.0001$ ; Tukey  
308 comparison between females with large litters and small litters,  $P < 0.001$ ; females with large  
309 litters vs. controls,  $P < 0.001$ ; females with small litters vs. controls,  $P = 0.031$ ). The repeated  
310 measures ANOVA on food consumption over the lactation period revealed no differences  
311 between females allocated a rodent feed containing Oxystat, which is rich in various synthetic  
312 antioxidants, and those that were not ( $F_{1,34} = 0.39$ ,  $P = 0.54$ ), and no significant interactions  
313 involving these food types (food type x treatment =  $F_{2,34} = 0.71$ ,  $P = 0.49$ ; food type x time =  
314  $F_{2,7,136} = 0.09$ ,  $P = 0.95$ ; food type x treatment x time =  $F_{5,4,136} = 0.53$ ,  $P = 0.76$ ).

315 Females in different reproductive groups also had different sized hearts (Fig. 1b;  
316 effect of group:  $F_{2,49} = 3.45$ ,  $P = 0.041$ ) and livers (Fig. 1c; effect of group:  $F_{2,52} = 31.21$ ,  $P <$   
317  $0.001$ ) at peak lactation, indicating altered energy demands. Females with a litter size of eight  
318 had larger hearts (Tukey comparison:  $P < 0.001$ ) and livers ( $P < 0.001$ ) than females in the  
319 control group, while females with a litter size of two only had larger livers than controls ( $P <$   
320  $0.001$ ; difference in heart weight,  $P = 0.62$ ). The diet females were allocated had no effect on  
321 the weights of either the liver ( $F_{2,49} = 0.06$ ,  $P = 0.81$ ) or heart ( $F_{2,49} < 0.01$ ,  $P = 0.99$ ).

322

323 **Oxidative stress and litter size**

324 Although females with a litter size of eight had greatly increased energetic demands,  
325 we found no evidence of increased oxidative stress in this treatment as indicated by protein  
326 thiol oxidation (Table 2). In the heart and gastrocnemius muscle, this marker of protein  
327 oxidation did not differ between females in different reproductive groups (Table 2).  
328 Surprisingly, in the liver, protein thiol groups were in higher abundance (indicating lower  
329 oxidative stress) in females with a larger litter when compared to those with a smaller litter  
330 (Table 2; Fig. 2a). To further ascertain the changes in protein oxidation that occur with  
331 reproductive investment in the liver we measured protein carbonyls, an irreversible marker of  
332 oxidative damage to proteins. This also indicated that females with large litters had decreased  
333 liver protein oxidation when compared to either females assigned a litter size of two and non-  
334 reproductive controls (Table 2; Fig. 2b)

335 As a further measure of oxidative stress we examined oxidation of glutathione, a  
336 marker of redox status and in some instances oxidative stress. Females in different  
337 reproductive groups did not differ in glutathione oxidation in either the heart or  
338 gastrocnemius muscle (Table 2). Glutathione oxidation did not differ significantly between  
339 groups in the liver, although there was a non-significant tendency for females with a litter  
340 size of two to have lower levels than females with large litters and non-reproductive controls  
341 (Table 2; Fig. 2c).

342 To further ascertain whether oxidative stress is related to reproductive effort, we  
343 tested whether oxidative stress was related to the difference between the size of litter a female  
344 bore and the size of litter she was experimentally assigned. Although the change in litter size  
345 ranged from a net increase in 5 pups to a net decrease by seven pups, the only significant  
346 relationship involved liver protein thiols, which indicated decreased protein oxidation in  
347 females with increased litter sizes (Table 3). We also did not observe any significant  
348 relationships between each female's natural litter size on the day of parturition and their level  
349 of oxidative stress at peak lactation, when either comparing all reproductive females together  
350 or analysing each reproductive group separately (Table 3).

351 We next tested whether the changes in markers of oxidative stress in the liver were  
352 related to the relatively large differences between the reproductive groups in liver mass.  
353 While liver mass was not a significant predictor of either protein carbonyls ( $F_{1,28} = 0.23$ ,  $P =$   
354  $0.64$ ) or oxidation of glutathione ( $F_{1,44.1} = 0.60$ ,  $P = 0.44$ ), it was related to liver protein thiol

355 concentration ( $F_{1,37} = 6.77$ ,  $P = 0.013$ ) - females with larger livers had a greater protein thiol  
356 concentration (indicating lower oxidation). However, the difference between reproductive  
357 groups for protein thiols remained significant ( $F_{2,37} = 4.76$ ,  $P = 0.015$ ) after including liver  
358 size as a covariate, with reproductive females having lower levels of protein oxidation.

359

### 360 **Antioxidant defence and litter size**

361 Changes in markers of protein oxidation (i.e. protein thiols and carbonyls) and redox  
362 status (oxidation of glutathione) may be related to modulation of antioxidant defences. In  
363 accordance with a previous study in lactating mice, we observed no differences between  
364 females in different reproductive treatments in the total concentration of glutathione (Table 2;  
365 Fig. 2d), an important low-molecular-mass antioxidant. However, inspection of liver  
366 antioxidant enzymes revealed that the activity of superoxide dismutase was significantly  
367 different between reproductive treatments (Table 2; Fig. 2e). Females that were lactating for a  
368 large litter had a higher activity of SOD than non-reproductive females, while females that  
369 were lactating for a smaller litter had intermediate values that did not differ significantly from  
370 either high lactation females or non-reproductive controls (Fig. 2e). There was also a  
371 tendency for catalase activity to differ between females in different reproductive treatments,  
372 which was attributable to females with small litters having higher activity levels than females  
373 in the other two groups (Fig. 2f).

374 As a further proxy of oxidative stress we measured the activity of aconitase in the  
375 liver. This enzyme is very susceptible to deactivation by the superoxide radical and can be  
376 used as a marker of ROS levels (Gardner et al., 1995; Gardner, 1997). As a substantial  
377 proportion of aconitase is located in the mitochondria (Gardner et al., 1995), we also  
378 measured a marker of mitochondrial density, citrate synthase, and used this to correct  
379 aconitase activity for mitochondrial density (Pichaud et al., 2010). Interestingly, citrate  
380 synthase activity was also greater in the livers of reproductive females (both large and small  
381 litter treatments) than in non-reproductive control females (mean activity for females with  
382 large litters:  $105.32 \pm 9.9$  units/mg protein; females with small litters:  $90.56 \pm 10.3$  units/mg  
383 protein; non-reproductives:  $66.95 \pm 4.7$  units/mg protein; effect of reproductive treatment:  
384  $F_{2,51} = 5.58$ ,  $P = 0.007$ ; comparison for females with enlarged litters vs. controls,  $P = 0.002$ ;  
385 females with reduced litters vs. controls,  $P = 0.055$ ; Table 2). This result indicates that  
386 mitochondrial density in the liver is increased at peak-lactation in wild-derived mice. When

387 aconitase activity was corrected by citrate synthase activity no differences were apparent  
388 between the females in different reproductive treatments ( $F_{2,51} = 1.54$ ,  $P = 0.23$ ) for this  
389 marker of oxidative damage.

390

### 391 **Birth litter size and oxidative stress**

392 While we found little evidence of increased oxidative damage with manipulated litter  
393 size, we observed significant associations between the litter size that each female was born  
394 into (i.e. her number of siblings) and her protein oxidation in the liver (Table 1; Fig 3).  
395 Compared to females that were born into a small litter, females from large litters had lower  
396 levels of protein thiols and higher levels of protein carbonyls in the liver, which indicates  
397 increased oxidative stress. Thus, our results indicate that females born into large litters have  
398 higher oxidative stress in the liver than those females born into small litters.

399

## 400 **DISCUSSION**

401 We found little evidence that oxidative stress increases in female mice lactating for  
402 experimentally enlarged litters. Although there has been much discussion about whether  
403 oxidative stress could cause the trade-off between reproduction and lifespan (Costantini,  
404 2008; Dowling and Simmons, 2009; Monaghan et al., 2009; Metcalfe and Alonso-Alvarez,  
405 2010; Isaksson et al., 2011; Selman et al., 2012), experimental evidence supporting this  
406 theory is sparse and is limited to correlative studies or examination of antioxidant defences  
407 rather than oxidative stress or oxidative damage *per se*.

408 The most frequently suggested pathway linking oxidative stress with reproduction  
409 relates to the high levels of metabolism associated with reproductive investment. These  
410 metabolic costs have been well studied in small rodents: in lactating laboratory mice,  
411 metabolic rate can increase to over 400% of that observed in non-reproductive females  
412 (Hammond, 1997). In studies using mice more recently derived from the wild, metabolism is  
413 still much greater than controls (Cretegnny and Genoud, 2006), although the difference is less  
414 pronounced. The metabolic costs of reproduction also increase with litter size (Speakman and  
415 McQueenie, 1996), although they have been found to plateau at large litter sizes in at least  
416 one strain of laboratory mouse (Johnson et al., 2001). Thus, females in this experiment with a

417 litter size of eight are likely to have experienced much greater metabolic rates than those  
418 assigned a litter size of two, - a prediction supported by the fact that females assigned eight  
419 pups consumed more food. Yet these increases in metabolism were not linked with an  
420 increase in markers of oxidative stress. Results from other studies in small rodents that have  
421 increased metabolic rate using different manipulations have also failed to find a  
422 straightforward relationship between metabolic rate and oxidative stress. For example,  
423 negligible effects were found on several different markers of oxidative damage and  
424 antioxidant protection in short-tailed field voles (*Microtus agrestis*) that had higher metabolic  
425 rates over life due to cold exposure (Selman et al., 2008). Thus, although an increased  
426 metabolic rate could elevate ROS production and oxidative stress in some instances, the links  
427 between these factors are not straightforward (Barja, 2007).

428         One important factor influencing ROS production during metabolism is the level of  
429 uncoupling of mitochondria, with increased uncoupling leading to a reduction in the  
430 production of ROS (Brand et al., 2004). This uncoupling can be unregulated (basal leak of  
431 protons mainly attributed to mitochondrial anion carriers) or catalysed by uncoupling proteins  
432 (UCP) (Brand et al., 2004). As described in the accompanying paper (Pichaud et al., 2013),  
433 we did not find a significant effect of unregulated uncoupling (state 2') in the livers of  
434 lactating mice, suggesting that the basal proton leak in liver mitochondria is not significantly  
435 affected by lactation. UCP-2, the only uncoupling protein expressed in the liver, has been  
436 shown to be unchanged in the brown adipose tissue of lactating mice (Pedraza et al., 2001).  
437 The role of UCP-2 in the regulation of ROS production is still under debate (Brand and  
438 Esteves, 2005; Pecqueur et al., 2008; Collins et al., 2012). However, if UCP-2 can modulate  
439 ROS production in the livers of lactating mice, it is possible this could influence the levels of  
440 oxidative damage in this tissue during lactation.

441         Other metabolic and cellular changes may occur during lactation that could,  
442 theoretically, influence the production of ROS (see Pichaud et al., 2013). It has previously  
443 been suggested that a higher mitochondrial density (observed in reproductive females in our  
444 study) may be associated with greater ROS production (Keller et al., 2004; Magwere et al.,  
445 2006). This could occur because there are a greater number of mitochondria to produce ROS  
446 and, perhaps more importantly, each mitochondrion would be working at a lower rate,  
447 increasing proton motive force (Magwere et al., 2006). As ROS production is strongly  
448 dependent on proton motive force (Korshunov et al., 1997; Toime and Brand, 2010), this  
449 could cause greater ROS production with a higher mitochondrial density. Further

450 experimental studies are required to show direct links between mitochondrial density and  
451 ROS production. However, investigations of the cellular and metabolic changes that occur to  
452 mitochondria during lactation (in the accompanying study by Pichaud et al., 2013) suggest  
453 that adjustments in both mitochondrial density and function might lead to higher ROS  
454 production in reproductive females. This, in turn, could trigger up-regulation of antioxidant  
455 defences that detoxify the cell from ROS and thus decrease oxidative damage (Pichaud et al.,  
456 2013).

457 In this study we provide evidence that an up-regulation of one particular antioxidant,  
458 SOD, is associated with the reduction in markers of protein oxidation when both are  
459 examined in the liver. During peak-lactation SOD activity was much greater in females with  
460 large experimental litters compared to controls, and this activity might have helped to  
461 transform ROS to less reactive forms, thus limiting damage to cellular components. Past  
462 manipulations of SOD expression have shown that this enzyme protects against oxidative  
463 damage (Dalle-Donne et al., 2003; Perez et al., 2009), particularly in the liver of mice  
464 (Elchuri et al., 2005). Manipulating the expression of SOD or other aspects of antioxidant  
465 defence during lactation may help to reveal whether endogenous antioxidant defence protects  
466 against oxidative stress during lactation.

467 Females with large litters generally had lower levels of oxidative damage to proteins  
468 in the liver, although there was a tendency for this group to have a higher proportion of  
469 oxidised glutathione when compared to females with a litter size of two. While this result  
470 does not reach the threshold usually required for significance, it is worthy to note that the  
471 difference between reproductive treatments went in a different direction when compared to  
472 the other oxidative stress markers. In contrast to the markers of protein oxidation, the  
473 proportion of oxidized glutathione is not a marker of oxidative damage *per se* – but rather a  
474 marker of the redox status (Jones, 2006). Sometimes a more oxidised redox status can  
475 indicate increased oxidative stress and can correlate with oxidative damage. However, it must  
476 also be noted that a change to an oxidised redox status can, in some instances, be beneficial,  
477 eliciting transcriptional regulation that protects against oxidative stress (Klatt et al., 1999;  
478 Townsend et al., 2003). Further examination of markers of redox status may help to reveal  
479 the relevance of the trend we observed and, potentially, how animals adjust their physiology  
480 in relation to reproductive status.



481           Some authors have cautioned that particular synthetic phenolic antioxidants added to  
482 limit long-term oxidation of some food products may limit the occurrence of oxidative stress  
483 when provided in foods at high levels (Jaeschke and Wendel, 1986; Malhotra et al., 2008).  
484 Dramatic increases in food intake during lactation, such as those we documented, will also  
485 influence the gross intake of these antioxidants. As these antioxidants would be largely  
486 unavailable in natural diets, we tested whether their presence in rodent feeds was the cause of  
487 the reductions in markers of oxidative stress previously reported with lactation (Garratt et al.,  
488 2011; Oldakowski et al., 2012). We found no differences in food consumption, oxidative  
489 damage or antioxidant defence between mice fed a standard rodent feed and those consuming  
490 a diet devoid of these antioxidants. Variation in food consumption and markers of oxidative  
491 balance was also not explained by an interaction between the diet an animal was consuming  
492 and their reproductive status. This indicates that the addition of these synthetic antioxidants to  
493 rodent chow is not responsible for the reduction in particular markers of oxidative stress  
494 observed in lactating females.

495           The food manipulation in our experiment was included as a precautionary measure, to  
496 ensure the suitability of our diet for experiments testing for changes in oxidative stress.  
497 However, other more biologically relevant dietary antioxidants, which are found in natural  
498 food sources, might influence oxidative stress during lactation. For example, Vitamins E has,  
499 in some studies, been shown to influence mammalian lifespan and levels of oxidative stress,  
500 although it is important to note that other studies have failed to find an effect on these  
501 parameters (Halliwell and Gutteridge, 1999; Keller et al., 2004; Banks et al., 2010). The diets  
502 fed to animals in our study had relatively low levels of vitamin E in relation to levels  
503 recommended by the American Society for Nutrition (Reeves et al., 1993), but enough to  
504 meet basic nutritional requirements. It is possible, however, that when animals reproduce in  
505 conditions where diets are deficient in vitamin E, or other dietary antioxidants, they may be  
506 more prone to oxidative stress. This is an area worthy of further investigation.

507           Our results highlight the need for caution when interpreting correlations between  
508 investment in life history traits and aspects of physiology. Correlations between oxidative  
509 damage and litter size have been reported two times in mammals (Bergeron et al., 2011;  
510 Garratt et al., 2011). However, these relationships may be generated from a number of  
511 different pathways and do not necessarily mean that oxidative stress increases with litter size.  
512 For example, females that produce large litters may have higher pre-existing levels of  
513 oxidative stress, perhaps if the level of reproductive investment is linked to metabolism, or if

514 the litter size a female produces is correlated with other aspects of physiology. Our  
515 experimental study suggests that during their first lactation, females with larger litters do not  
516 incur a cost of higher oxidative damage, at least in the tissues we examined. Our results  
517 leave open the possibility, however, that if the costs of reproduction are exacted in oxidative  
518 damage or oxidative stress they occur during or after later parities or in subsequent  
519 generations.

520 We provide correlative evidence here that this latter possibility may be occurring.  
521 Females that had the greatest number of siblings (i.e. were themselves derived from large  
522 litters) had the greatest levels of protein oxidation in the liver, an effect that was consistent  
523 across each experimental group. In birds, experimentally increasing brood size can have  
524 negative effects on the antioxidant defences of chicks when they become adults (Alonso-  
525 Alvarez et al., 2006). It has even been suggested that changes in this aspect of physiology  
526 could, at least in part, be the cause of the reduced reproductive capacity of adult birds that  
527 were reared in large broods (Alonso-Alvarez et al., 2006). It is possible that oxidative stress  
528 may also be influenced by rearing environment and sibling competition in mammals,  
529 although this remains to be tested by direct experimental studies and examination of markers  
530 of oxidative stress in other tissues.

531

## 532 **ACKNOWLEDGEMENTS**

533 This study was approved by the UNSW Animal Ethics Committee (approval number:  
534 11/45A). We thank Heather Try for assistance with animal maintenance.

535

## 536 **FUNDING**

537 This study was funded by an ARC Discovery Grant awarded to Robert C. Brooks

538

## 539 **REFERENCES**

- 540 **Aebi, H.** (1984). Catalase. In *Methods Enzymol.*, vol. 105, pp. 121-126. New York and London:  
541 Academic Press.  
542 **Alonso-Alvarez, C., Bertrand, S., Devevey, G., Prost, J., Faivre, B. and Sorci, G.** (2004). Increased  
543 susceptibility to oxidative stress as a proximate cost of reproduction. *Ecol. Lett.* **7**, 363-368.

544 **Alonso-Alvarez, C., Bertrand, S., Devevey, G., Prost, J., Faivre, B., Chastel, O. and Sorci, G.** (2006).  
545 An experimental manipulation of life-history trajectories and resistance to oxidative stress. *Evolution*  
546 **60**, 1913-1924.

547 **Anderson, M. E.** (1996). Measurement of antioxidants: glutathione. In *Free radicals, a practical*  
548 *approach*, eds. N. A. PUNCHARD and F. J. KELLY, pp. 213 - 226. Oxford, U.K.: Oxford University Press.

549 **Balaban, R. S., Nemoto, S. and Finkel, T.** (2005). Mitochondria, oxidants, and aging. *Cell* **120**, 483-  
550 495.

551 **Banks, R., Speakman, J. R. and Selman, C.** (2010). Vitamin E supplementation and mammalian  
552 lifespan. *Mol. Nutr. Food Res.* **54**, 719-725.

553 **Barja, G.** (2007). Mitochondrial oxygen consumption and reactive oxygen species production are  
554 independently modulated: Implications for aging studies. *Rejuvenation Research* **10**, 215-223.

555 **Beckman, K. B. and Ames, B. N.** (1998). The free radical theory of aging matures. *Physiol. Rev.* **78**,  
556 547-581.

557 **Bergeron, P., Careau, V., Humphries, M. M., Reale, D., Speakman, J. R. and Garant, D.** (2011). The  
558 energetic and oxidative costs of reproduction in a free-ranging rodent. *Funct. Ecol.* **25**, 1063-1071.

559 **Berry, R. J.** (1981). Biology of the house mouse. New York: Academic Press Inc.

560 **Brand, M. D. and Esteves, T. C.** (2005). Physiological functions of the mitochondrial uncoupling  
561 proteins UCP2 and UCP3. *Cell Metab.* **2**, 85-93.

562 **Brand, M. D., Affourtit, C., Esteves, T. C., Green, K., Lambert, A. J., Miwa, S., Pakay, J. L. and Parker,**  
563 **N.** (2004). Mitochondrial superoxide: Production, biological effects, and activation of uncoupling  
564 proteins. *Free Radical Biol. Med.* **37**, 755-767.

565 **Christe, P., Glaizot, O., Strepparava, N., Devevey, G. and Fumagalli, L.** (2012). Twofold cost of  
566 reproduction: an increase in parental effort leads to higher malarial parasitaemia and to a decrease  
567 in resistance to oxidative stress. *Proceedings of the Royal Society B: Biological Sciences* **279**, 1142-  
568 1149.

569 **Clutton-Brock, T. H.** (1991). The evolution of parental care. New Jersey: Princeton University Press.

570 **Collins, S., Pi, J. B. and Yehuda-Shnaidman, E.** (2012). Uncoupling and reactive oxygen species (ROS)  
571 - A double-edged sword for beta-cell function? "Moderation in all things". *Best Pract. Res. Clin.*  
572 *Endoc. Metab.* **26**, 753-758.

573 **Costantini, D.** (2008). Oxidative stress in ecology and evolution: lessons from avian studies. *Ecol.*  
574 *Lett.* **11**, 1238-1251.

575 **Cretegy, C. and Genoud, M.** (2006). Rate of metabolism during lactation in small terrestrial  
576 mammals (*Crocidura russula*, *Mus domesticus* and *Microtus arvalis*). *Comp. Biochem. Physiol. A-Mol.*  
577 *Integr. Physiol.* **144**, 125-134.

578 **Dalle-Donne, I., Rossi, R., Giustarini, D., Milzani, A. and Colombo, R.** (2003). Protein carbonyl  
579 groups as biomarkers of oxidative stress. *Clin. Chim. Acta* **329**, 23-38.

580 **Dimonte, D., Ross, D., Bellomo, G., Eklow, L. and Orrenius, S.** (1984). Alterations in intracellular  
581 thiol homeostasis during the metabolism of menadione by isolated rat hepatocytes *Arch Biochem*  
582 *Biophys* **235**, 334-342.

583 **Dowling, D. K. and Simmons, L. W.** (2009). Reactive oxygen species as universal constraints in life-  
584 history evolution. *Proc. R. Soc. B* **276**, 1737-1745.

585 **Droge, W.** (2002). Free radicals in the physiological control of cell function. *Physiol. Rev.* **82**, 47-95.

586 **Elchuri, S., Oberley, T. D., Qi, W. B., Eisenstein, R. S., Roberts, L. J., Van Remmen, H., Jepsstein, C. J.**  
587 **and Huang, T. T.** (2005). CuZnSOD deficiency leads to persistent and widespread oxidative damage  
588 and hepatocarcinogenesis later in life. *Oncogene* **24**, 367-380.

589 **Gardner, P. R.** (1997). Superoxide-driven aconitase FE-S center cycling. *Biosci Rep* **17**, 33-42.

590 **Gardner, P. R., Raineri, I., Epstein, L. B. and White, C. W.** (1995). Superoxide radical and iron  
591 modulate aconitase activity in mammalian-cells. *J. Biol. Chem.* **270**, 13399-13405.

592 **Garratt, M., Vasilaki, A., Stockley, P., McArdle, F., Jackson, M. and Hurst, J. L.** (2011). Is oxidative  
593 stress a physiological cost of reproduction? An experimental test in house mice. *Proc. R. Soc. B* **278**,  
594 1098-1106.

595 **Gittleman, J. L. and Thompson, S. D.** (1988). Energy Allocation in Mammalian Reproduction. *Am.*  
596 *Zool.* **28**, 863-875.

597 **Halliwell, B. and Gutteridge, J. M.** (1999). Free radicals in biology and medicine. Oxford, U.K.: Oxford  
598 University Press.

599 **Hammond, K. A.** (1997). Adaptation of the maternal intestine during lactation. *J Mammary Gland*  
600 *Biol Neoplasia* **2**, 243-252.

601 **Hammond, K. A., Konarzewski, M., Torres, R. M. and Diamond, J.** (1994). Metabolic Ceilings under a  
602 Combination of Peak Energy Demands. *Physiol. Zool.* **67**, 1479-1506.

603 **Harman, D.** (1956). Aging - a theory based on free-radical and radiation-chemistry *J Gerontol* **11**,  
604 298-300.

605 **Harshman, L. G. and Zera, A. J.** (2007). The cost of reproduction: the devil in the details. *Trends Ecol.*  
606 *Evol.* **22**, 80-86.

607 **Hausladen, A. and Fridovich, I.** (1994). Superoxide and peroxynitrite inactivate aconitases, but nitric-  
608 oxide does not. *J. Biol. Chem.* **269**, 29405-29408.

609 **Hausladen, A. and Fridovich, I.** (1996). Measuring nitric oxide and superoxide: rate constants for  
610 aconitase reactivity. *Methods Enzymol.* **269**, 37-41.

611 **Isaksson, C., Sheldon, B. and Uller, T.** (2011). The Challenges of Integrating Oxidative Stress into Life-  
612 history Biology. *Bioscience* **61**, 194-202.

613 **Jaeschke, H. and Wendel, A.** (1986). Manipulation of mouse organ glutathione contents .2. time and  
614 dose-dependent induction of the glutathione conjugation system by phenolic antioxidants.  
615 *Toxicology* **39**, 59-70.

616 **Johnson, M. S., Thomson, S. C. and Speakman, J. R.** (2001). Limits to sustained energy intake I.  
617 Lactation in the laboratory mouse *Mus musculus*. *J. Exp. Biol.* **204**, 1925-1935.

618 **Jones, D. P.** (2006). Redefining oxidative stress. *Antioxidants & Redox Signaling* **8**, 1865-1879.

619 **Keller, M., Sommer, A. M., Portner, H. O. and Abele, D.** (2004). Seasonality of energetic functioning  
620 and production of reactive oxygen species by lugworm (*Arenicola marina*) mitochondria exposed to  
621 acute temperature changes. *J. Exp. Biol.* **207**, 2529-2538.

622 **Kirkwood, T. B. L. and Holliday, R.** (1979). Evolution of aging and longevity. *Proc. R. Soc. B* **205**, 531-  
623 546.

624 **Klatt, P., Molina, E. P., De Lacoba, M. G., Padilla, C. A., Martinez-Galisteo, E., Barcena, J. A. and**  
625 **Lamas, S.** (1999). Redox regulation of c-Jun DNA binding by reversible S-glutathiolation. *FASEB J.* **13**,  
626 1481-1490.

627 **Koivula, M., Koskela, E., Mappes, T. and Oksanen, T. A.** (2003). Cost of reproduction in the wild:  
628 Manipulation of reproductive effort in the bank vole. *Ecology* **84**, 398-405.

629 **Korshunov, S. S., Skulachev, V. P. and Starkov, A. A.** (1997). High protonic potential actuates a  
630 mechanism of production of reactive oxygen species in mitochondria. *FEBS Lett.* **416**, 15-18.

631 **Lessells, C. K. M.** (1991). The evolution of life histories. In *Behavioural Ecology*, eds. J. R. Krebs and  
632 N. B. Davies). Oxford: Blackwell Scientific Publications.

633 **Magwere, T., Goodall, S., Skepper, J., Mair, W., Brand, M. D. and Partridge, L.** (2006). The effect of  
634 dietary restriction on mitochondrial protein density and flight muscle mitochondrial morphology in  
635 *Drosophila*. *J. Gerontol. Ser. A-Biol. Sci. Med. Sci.* **61**, 36-47.

636 **Malhotra, J. D., Miao, H., Zhang, K., Wolfson, A., Pennathur, S., Pipe, S. W. and Kaufman, R. J.**  
637 (2008). Antioxidants reduce endoplasmic reticulum stress and improve protein secretion. *Proc Natl*  
638 *Acad Sci U S A* **105**, 18525-18530.

639 **Metcalfe, N. B. and Alonso-Alvarez, C.** (2010). Oxidative stress as a life-history constraint: the role of  
640 reactive oxygen species in shaping phenotypes from conception to death. *Funct. Ecol.* **24**, 984-996.

641 **Monaghan, P., Metcalfe, N. B. and Torres, R.** (2009). Oxidative stress as a mediator of life history  
642 trade-offs: mechanisms, measurements and interpretation. *Ecol. Lett.* **12**, 75-92.

643 **Nussey, D. H., Pemberton, J. M., Pilkington, J. G. and Blount, J. D.** (2009). Life history correlates of  
644 oxidative damage in a free-living mammal population. *Funct. Ecol.* **23**, 809-817.

- 645 **Ołdakowski, Ł., Piotrowska, Ż., Chrzęścik, K. M., Sadowska, E. T., Koteja, P. and Taylor, J. R. E.**  
646 (2012). Is reproduction costly? No increase of oxidative damage in breeding bank voles. *The Journal*  
647 *of Experimental Biology* **215**, 1799-1805.
- 648 **Partridge, L., Gems, D. and Withers, D. J.** (2005). Sex and death: What is the connection? *Cell* **120**,  
649 461-472.
- 650 **Pecqueur, C., Bui, T., Gelly, C., Hauchard, J., Barbot, C., Bouillaud, F., Ricquier, D., Miroux, B. and**  
651 **Thompson, C. B.** (2008). Uncoupling protein-2 controls proliferation by promoting fatty acid  
652 oxidation and limiting glycolysis-derived pyruvate utilization. *FASEB J.* **22**, 9-18.
- 653 **Pedraza, N., Solanes, G., Iglesias, R., Vazquez, M., Giralt, M. and Villarroya, F.** (2001). Differential  
654 regulation of expression of genes encoding uncoupling proteins 2 and 3 in brown adipose tissue  
655 during lactation in mice. *Biochem. J.* **355**, 105-111.
- 656 **Perez, V. I., Bokov, A., Van Remmen, H., Mele, J., Ran, Q. T., Ikeno, Y. and Richardson, A.** (2009). Is  
657 the oxidative stress theory of aging dead? *Biochimica Et Biophysica Acta-General Subjects* **1790**,  
658 1005-1014.
- 659 **Pichaud, N., Chatelain, E. H., Ballard, J. W. O., Tanguay, R., Morrow, G. and Blier, P. U.** (2010).  
660 Thermal sensitivity of mitochondrial metabolism in two distinct mitotypes of *Drosophila simulans*:  
661 evaluation of mitochondrial plasticity. *J. Exp. Biol.* **213**, 1665-1675.
- 662 **Reeves, P. G., Nielsen, F. H. and Fahey, G. C.** (1993). AIN-93 purified diets for laboratory rodents -  
663 final report of the American Institute of Nutrition ad hoc writing committee on the reformulation of  
664 the AIN-76a rodent diet. *J. Nutr.* **123**, 1939-1951.
- 665 **Selman, C., Blount, J. D., Nussey, D. H. and Speakman, J. R.** (2012). Oxidative damage, ageing, and  
666 life-history evolution: where now? *Trends in ecology & evolution (Personal edition)*.
- 667 **Selman, C., Lumsden, S., Bunker, L., Hill, W. G. and Speakman, J. R.** (2001). Resting metabolic rate  
668 and morphology in mice (*Mus musculus*) selected for high and low food intake. *J. Exp. Biol.* **204**, 777-  
669 784.
- 670 **Selman, C., McLaren, J. S., Collins, A. R., Duthie, G. G. and Speakman, J. R.** (2008). The impact of  
671 experimentally elevated energy expenditure on oxidative stress and lifespan in the short-tailed field  
672 vole *Microtus agrestis*. *Proc. R. Soc. B* **275**, 1907-1916.
- 673 **Speakman, J. R.** (2008). The physiological costs of reproduction in small mammals. *Phil. Trans. R.*  
674 *Soc. B* **363**, 375-398.
- 675 **Speakman, J. R. and McQueenie, J.** (1996). Limits to sustained metabolic rate: The link between  
676 food intake, basal metabolic rate, and morphology in reproducing mice, *Mus musculus*. *Physiol. Zool.*  
677 **69**, 746-769.
- 678 **Stearns, S. C.** (1992). The evolution of life histories. Oxford: Oxford University Press.
- 679 **Toime, L. J. and Brand, M. D.** (2010). Uncoupling protein-3 lowers reactive oxygen species  
680 production in isolated mitochondria. *Free Radical Biol. Med.* **49**, 606-611.
- 681 **Townsend, D. M., Tew, K. D. and Tapiero, H.** (2003). The importance of glutathione in human  
682 disease. *Biomedicine & Pharmacotherapy* **57**, 145-155.
- 683 **Vasilaki, A., Mansouri, A., Van Remmen, H., van der Meulen, J. H., Larkin, L., Richardson, A. G.,**  
684 **McArdle, A., Faulkner, J. A. and Jackson, M. J.** (2006). Free radical generation by skeletal muscle of  
685 adult and old mice: effect of contractile activity. *Ageing Cell* **5**, 109-117.
- 686 **Wiegand, G. and Remington, S. J.** (1986). Citrate synthase - structure, control, and mechanism. *Annu*  
687 *Rev Biophys Biophys Chem* **15**, 97-117.
- 688 **Wiersma, P., Selman, C., Speakman, J. R. and Verhulst, S.** (2004). Birds sacrifice oxidative protection  
689 for reproduction. *Proc. R. Soc. B* **271**, S360-S363.
- 690 **Williams, G. C.** (1957). Pleiotropy, natural selection, and the evolution of senescence. *Evolution* **11**  
691 398-411.
- 692 **Zelko, I. N., Mariani, T. J. and Folz, R. J.** (2002). Superoxide dismutase multigene family: A  
693 comparison of the CuZn-SOD (SOD1), Mn-SOD (SOD2), and EC-SOD (SOD3) gene structures,  
694 evolution, and expression. *Free Radical Biol. Med.* **33**, 337-349.

695

696

697

698 **Tables:**

699 Table 1. Markers of oxidative damage and antioxidant defence examined in this study.

| Marker                                      | What it assesses                                                                                                                                                         | References                                                 |
|---------------------------------------------|--------------------------------------------------------------------------------------------------------------------------------------------------------------------------|------------------------------------------------------------|
| Protein Thiols                              | Groups on proteins that are essential for stability and/or function, but are susceptible to oxidation. A reduction in these groups is indicative of protein oxidation.   | (Halliwell and Gutteridge, 1999; Di Monte et al., 1984)    |
| Protein Carbonyls                           | Product of ROS attack on amino-acid residues in proteins. An increase is indicative of increased protein oxidation.                                                      | (Halliwell and Gutteridge, 1999; Dalle-Donne et al., 2003) |
| Total Glutathione                           | Most abundant intracellular thiol with a variety of antioxidant roles.                                                                                                   | (Halliwell and Gutteridge, 1999; Townsend et al., 2003)    |
| Proportion of Oxidised to Total Glutathione | Oxidised glutathione is the product of glutathione oxidation. This ratio is an indicator of oxidative stress and the redox status of a sample.                           | (Jones, 2006; Anderson, 1996)                              |
| Superoxide Dismutase                        | Accelerates the dismutation of the superoxide radical to hydrogen peroxide and oxygen. Has been described as "the first and most important line of antioxidant defence". | (Halliwell and Gutteridge, 1999; Zelko et al., 2002)       |
| Catalase                                    | Catalyse the decomposition of hydrogen peroxide to oxygen. This is an important antioxidant.                                                                             | (Halliwell and Gutteridge, 1999)                           |
| Aconitase                                   | Enzyme that is very susceptible to deactivation by the superoxide radical and can be used as a marker of ROS levels.                                                     | (Gardner et al., 1995; Gardner, 1997)                      |
| Citrate Synthase                            | Enzyme that catalyses a step of the citric acid cycle. Activity levels are used as a marker of mitochondrial density.                                                    | (Wiegand and Remington, 1986; Pichaud et al., 2010)        |

700

Table 2. Effect of reproductive treatment, diet and the number of siblings the experimental animals they themselves had while they were reared on markers of oxidative stress and antioxidant defence.

|                                             | N<br>(C,H,L) | Reproductive treatment |      |       | Food |         |      | Reproductive treatment X food |      |       | Dam's number of siblings |         |       |
|---------------------------------------------|--------------|------------------------|------|-------|------|---------|------|-------------------------------|------|-------|--------------------------|---------|-------|
|                                             |              | df                     | F    | P     | df   | F       | P    | df                            | F    | P     | df                       | F       | P     |
| <b>Oxidative stress marker</b>              |              |                        |      |       |      |         |      |                               |      |       |                          |         |       |
| Protein thiols                              |              |                        |      |       |      |         |      |                               |      |       |                          |         |       |
| Liver                                       | 17,15,13     | 2,34                   | 5.55 | 0.008 | 1,37 | 0.44    | 0.51 | 2,33                          | 1.02 | 0.37  | 1,14                     | 4.82    | 0.045 |
| Heart                                       | 18,16,15     | 2,39                   | 0.76 | 0.47  | 1,39 | > 0.001 | 0.99 | 2,39                          | 0.66 | 0.53  | 1,18                     | 1.34    | 0.26  |
| Muscle                                      | 18,17,14     | 2,35                   | 0.48 | 0.62  | 1,38 | 0.47    | 0.5  | 2,33                          | 1.64 | 0.21  | 1,11                     | > 0.001 | 0.97  |
| Proportion of oxidised to total glutathione |              |                        |      |       |      |         |      |                               |      |       |                          |         |       |
| Liver                                       | 20,18,15     | 2,38                   | 3.22 | 0.051 | 1,43 | 1.36    | 0.25 | 2,38                          | 0.24 | 0.79  | 1,14                     | 1.47    | 0.25  |
| Heart                                       | 20,18,15     | 2,42                   | 0.92 | 0.41  | 1,42 | 0.086   | 0.77 | 2,41                          | 0.79 | 0.46  | 1,15                     | 0.51    | 0.49  |
| Muscle                                      | 17,17,15     | 2,36                   | 0.06 | 0.94  | 1,42 | 2.23    | 0.14 | 2,35                          | 4.19 | 0.023 | 1,21.7                   | 1.02    | 0.32  |
| Total glutathione                           |              |                        |      |       |      |         |      |                               |      |       |                          |         |       |
| Liver                                       | 18,15,13     | 2,30                   | 0.07 | 0.94  | 1,37 | 0.08    | 0.79 | 2,28                          | 0.48 | 0.62  | 1,9                      | 0.72    | 0.42  |
| Heart                                       | 20,18,15     | 2,40                   | 1.63 | 0.21  | 1,44 | 0.001   | 0.97 | 2,40                          | 0.31 | 0.74  | 1,19                     | 0.37    | 0.55  |
| Muscle                                      | 17,17,14     | 2,27                   | 0.85 | 0.44  | 1,41 | 1.56    | 0.22 | 2,26                          | 1.42 | 0.26  | 1,12                     | 0.31    | 0.59  |
| Additional liver markers                    |              |                        |      |       |      |         |      |                               |      |       |                          |         |       |
| Carbonyls                                   | 13,11,12     | 2,29                   | 4.71 | 0.017 | 1,29 | 1.71    | 0.2  | 2,29                          | 2.46 | 0.1   | 1,29                     | 4.21    | 0.049 |
| Superoxide dismutase                        | 12,12,12     | 2,27                   | 4.44 | 0.021 | 1,27 | 1.64    | 0.24 | 2,27                          | 1.11 | 0.45  | 1,27                     | 1.04    | 0.32  |
| Catalase                                    | 18,17,14     | 2,37                   | 2.87 | 0.069 | 1,41 | 0.16    | 0.69 | 2,36                          | 0.04 | 0.96  | 1,16                     | 1.13    | 0.3   |
| <b>Mitochondrial marker</b>                 |              |                        |      |       |      |         |      |                               |      |       |                          |         |       |
| Citrate synthase                            | 19,18,15     | 2,40                   | 5.58 | 0.007 | 1,44 | 0.014   | 0.91 | 2,39                          | 0.06 | 0.94  | 1,21                     | 1.1     | 0.38  |
| Aconitase/citrate synthase                  | 19,18,15     | 2,45                   | 1.45 | 0.25  | 1,45 | 0.62    | 0.44 | 2,45                          | 0.89 | 0.42  | 1,45                     | 1.68    | 0.2   |



Table 3. Relationships between oxidative stress and (1) the difference between natural and manipulated litter sizes and (2) each female's natural litter size.

|                                             | Increase in pup number |                |         | Natural litter size - all reproductives |                |         | Natural litter size - 2 pups |                |         | Natural litter size - 8 pups |                |         |
|---------------------------------------------|------------------------|----------------|---------|-----------------------------------------|----------------|---------|------------------------------|----------------|---------|------------------------------|----------------|---------|
|                                             | n                      | r <sub>s</sub> | P-value | n                                       | r <sub>s</sub> | P-value | n                            | r <sub>s</sub> | P-value | n                            | r <sub>s</sub> | P-value |
| Protein thiols                              |                        |                |         |                                         |                |         |                              |                |         |                              |                |         |
| Liver                                       | 28                     | 0.43           | 0.024   | 28                                      | -0.07          | 0.74    | 13                           | 0.24           | 0.43    | 15                           | 0.08           | 0.78    |
| Heart                                       | 31                     | -0.01          | 0.95    | 31                                      | 0.21           | 0.25    | 15                           | -0.41          | 0.12    | 16                           | 0.42           | 0.11    |
| Muscle                                      | 31                     | -0.18          | 0.34    | 31                                      | 0.15           | 0.43    | 14                           | 0.03           | 0.93    | 17                           | 0.21           | 0.43    |
| Proportion of oxidised to total glutathione |                        |                |         |                                         |                |         |                              |                |         |                              |                |         |
| Liver                                       | 33                     | 0.28           | 0.12    | 33                                      | -0.12          | 0.50    | 15                           | -0.45          | 0.10    | 18                           | -0.09          | 0.74    |
| Heart                                       | 33                     | 0.33           | 0.063   | 33                                      | -0.25          | 0.16    | 15                           | -0.53          | 0.04    | 18                           | -0.01          | 0.99    |
| Muscle                                      | 32                     | -0.02          | 0.90    | 32                                      | 0.07           | 0.70    | 15                           | 0.31           | 0.26    | 17                           | 0.05           | 0.84    |
| Total glutathione                           |                        |                |         |                                         |                |         |                              |                |         |                              |                |         |
| Liver                                       | 28                     | 0.04           | 0.82    | 28                                      | -0.01          | 0.097   | 13                           | 0.21           | 0.49    | 15                           | -0.09          | 0.76    |
| Heart                                       | 33                     | -0.18          | 0.31    | 33                                      | 0.24           | 0.17    | 15                           | -0.12          | 0.67    | 18                           | 0.49           | 0.038   |
| Muscle                                      | 31                     | 0.01           | 0.96    | 31                                      | 0.22           | 0.25    | 14                           | 0.03           | 0.92    | 17                           | 0.43           | 0.084   |
| Additional liver markers                    |                        |                |         |                                         |                |         |                              |                |         |                              |                |         |
| Carbonyls                                   | 23                     | -0.33          | 0.12    | 23                                      | -0.02          | 0.94    | 12                           | -0.46          | 0.13    | 11                           | -0.39          | 0.24    |
| Superoxide dismutase                        | 24                     | 0.3            | 0.16    | 28                                      | -0.33          | 0.12    | 12                           | 0.22           | 0.5     | 12                           | -0.29          | 0.37    |
| Catalase                                    | 31                     | -0.21          | 0.27    | 31                                      | -0.01          | 0.97    | 14                           | 0.17           | 0.56    | 17                           | -0.3           | 0.24    |
| Mitochondrial marker                        |                        |                |         |                                         |                |         |                              |                |         |                              |                |         |
| Citrate synthase                            | 33                     | 0.19           | 0.30    | 33                                      | -0.06          | 0.74    | 15                           | 0.25           | 0.38    | 18                           | -0.01          | 0.99    |
| Aconitase/citrate synthase                  | 33                     | 0.15           | 0.39    | 33                                      | 0.08           | 0.65    | 15                           | -0.03          | 0.92    | 18                           | 0.16           | 0.54    |

## Figure legends

**Figure 1.** The impact of litter size manipulation on food consumption and organ weight. Females that had their litter size manipulated to eight pups ate much more food during lactation (a.), had heavier livers (b.) and heavier hearts (c.). Untransformed data is displayed with Means and SEMs.

**Figure 2.** Female reproductive investment and markers of oxidative stress and antioxidant defence in the liver. \* denotes  $P < 0.05$ ; \*\* denotes  $P < 0.01$ . Untransformed data is displayed with Means and SEMs.

**Figure 3.** Oxidative stress in the liver and the number of siblings that females were reared with. Females reared with a greater number of siblings had lower aconitase activity (a), a higher concentration of protein carbonyls (b) and a lower concentration of protein thiols (c), changes that indicate increased oxidative stress. Untransformed data is displayed with Means and SEMs.

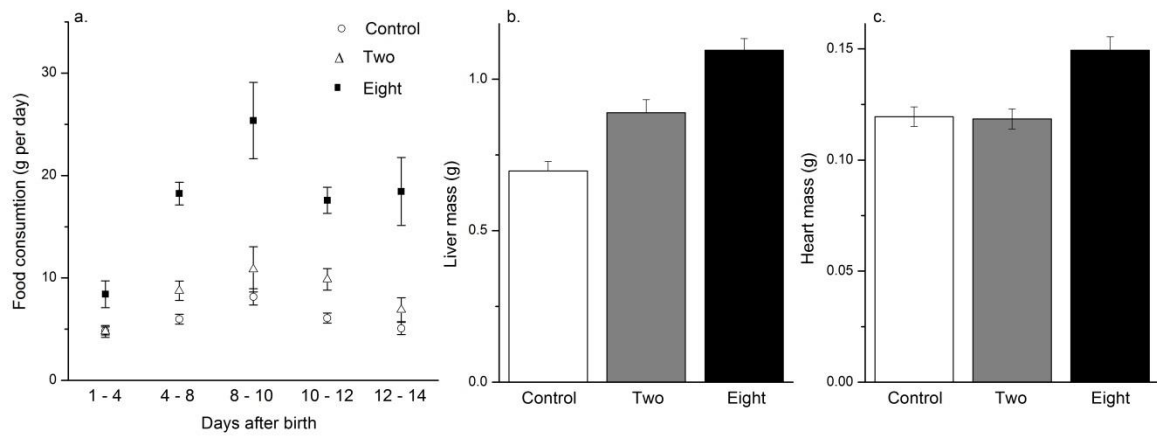

Figure 1.

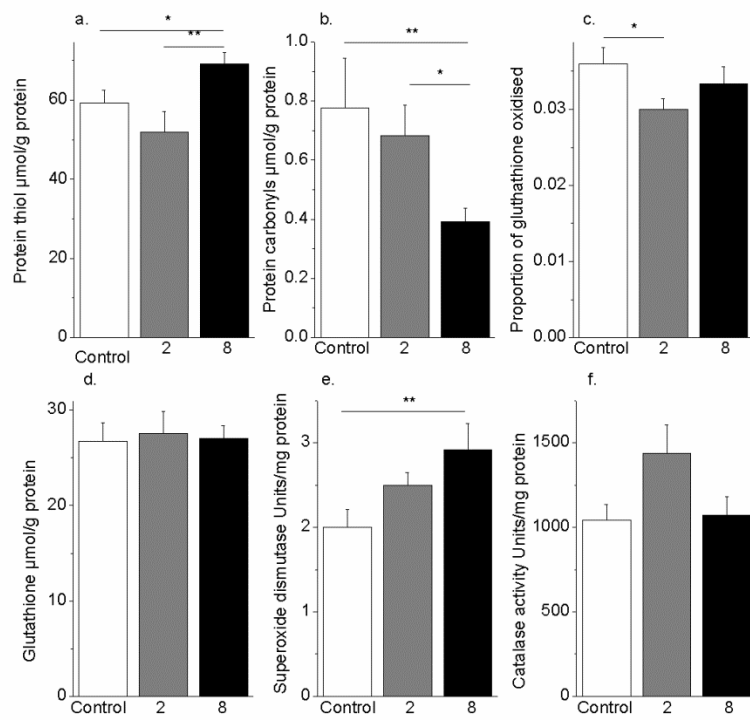

Figure 2.

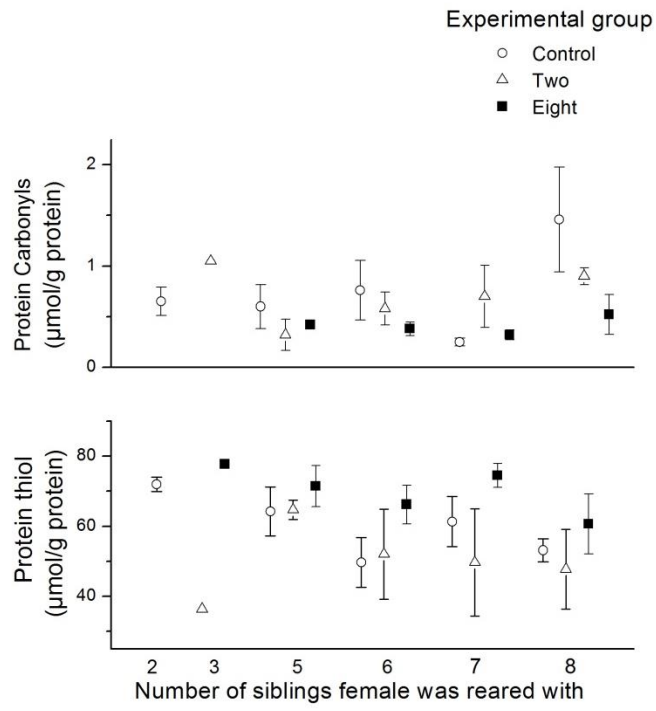

Figure 3.
